# Supplementary material for: Production of butadiene by oxidative butane dehydrogenation with NO: effect of the oxidant species and lattice oxygen mobility in V2O5–WO3/TiO2 catalyst
Source: Royal Society of Chemistry journal article supplement (doi:10.1039/d1cy02133h), 2022-01-01
Supplement: d1cy02133h1.pdf [file d1cy02133h1.pdf]

## Electronic Supplementary information

### 1. Characterisation Methods:

The physisorption analyses were carried out by degassing the catalysts under N<sub>2</sub> flow for 2 h at 200 °C. The degassed samples were analyzed in a Micromeritics ASAP 2020. Temperature programmed reduction (TPR) was carried out on the catalyst samples using the Micromeritics 2920 Autochem II Chemisorption Analyser. Prior to the reduction of the sample in TPR, the catalyst was pre-treated by heating under a stream of argon (30 mL/min) at 400 °C for 30 min and then cooled to 80 °C. Thereafter, 15 % butane in Ar was used as a reducing agent at a flow rate of 30 mL/min. Samples were analyzed from room temperature to 600 °C using a ramp rate of 10 °C/min. The amount of reductant consumed was measured using a thermal conductivity detector.

Metal dispersion on the surface of the catalyst was measured using O<sub>2</sub>-Pulse chemisorption also performed by an AutoChem II 2920 station from Micromeritics as explained in [1]. The samples (300 mg), placed in a U-shaped quartz reactor with an inner diameter of 0.5 cm, were pre-treated under 5% H<sub>2</sub> in Ar a temperature of 500 °C for 2 h. Then, the catalyst was cooled down to 80 °C under a He flows of 50 mL/min and maintain at this temperature for 3 h before further heating to the desired temperature for chemisorptions in order to clean the catalyst surface and to avoid the presence of residual adsorbed hydrogen. O<sub>2</sub>-Pulse chemisorption was performed at a temperature of 450 °C. The volume of the injection loop was 0.5 cm<sup>3</sup>. The carrier gas was Ar in the case of O<sub>2</sub> pulses (5% O<sub>2</sub> in Ar,) and pulses of O<sub>2</sub> were injected into the catalytic reactor corresponding to 0.5 μmol of O<sub>2</sub>. The O<sub>2</sub> consumption was measured with the same TCD used for TPR equipped with a water trap. Pulses injection, sample temperature, and TCD signals were controlled and monitored by a computer equipped with the software Micromeritics AutoChemII. TCD data were analyzed using the Origin software.

Acidity and basicity of the catalyst was measured by NH<sub>3</sub> and CO<sub>2</sub> desorption methods using Micromeritics 2920 Autochem II Chemisorption Analyser. The catalyst was pre-treated at 350 °C under the stream of helium for 60 min in order to remove the physisorbed gases on the surface of the catalysts. The temperature was then decreased to 80 °C. Appropriate gas was passed over the catalyst (9.8 % NH<sub>3</sub> in He / 10 % CO<sub>2</sub> in He) and at a flow rate of 30 mL/min for 60 min. The excess gas was removed by purging with helium for 30 min. The temperature was then raised gradually to 600 °C by ramping at 10 °C/min under the flow of helium and desorption data of NH<sub>3</sub> or CO<sub>2</sub> was recorded. Particle size, morphology and elemental mapping,

performed by EDXS analysis, were further investigated using Cs-corrected scanning transmission electron microscope (TEM) (JEOL, JEM-ARM200CF), equipped with JEOL Centurio 100 mm<sup>2</sup> EDXS system.

The X-ray photoelectron spectroscopy (XPS or ESCA) analyses were carried out on the PHI-TFA XPS spectrometer produced by Physical Electronics Inc. using X-ray radiation from monochromatic Al source. The analyzed area was 0.4 mm in diameter and the analyzed depth was about 3 - 5 nm. The survey wide-energy spectra were taken with pass energy of analyzer of 187 eV and the high-energy resolution spectra were taken with pass energy of 29 eV. Spectra were aligned by setting the C 1s peak at 284.8 eV, characteristic for C-C/C-H bonds. The accuracy of binding energies was about  $\pm 0.3$  eV.

The main catalyzed products were analyzed by using Perkin Elmer Clarus 400 FID and TCD gas chromatographs. In the GC, the flame ionization detector (FID) connected to a SGE BP-PONA capillary column (0.25 mm ID and 50 m length) was used to analyze the organic products at oven temperatures ramping between 40 and 200 °C. The thermal conductivity detector (TCD) with a SUPELCO Carboxen (0.53 mm ID and 30 m length) column was used to analyze the carbon oxides. The signals of GC were calibrated using the mixtures with different moles of products that are in order to determine the moles of the gases in the outflow. A Perkin Elmer Clarus 500 GC-MS was used to identify unknown products from the reaction stream. The calculated carbon balance was between 97 and 100%. All data points were obtained in duplicate with an error of  $\pm 2\%$ .

The rate constant “k” was obtained using the integrated rate law (An introduction to chemical kinetics by Claire Vallance, Morgan & Claypool Publishers, 2017), by using the moles of butane present in inlet and outlet gases in a unit time (3 h) at a particular temperature. The rates were determined at a particular temperature in the range of 300 °C and 500 °C. The natural log of the rate constant (-lnk) was plotted versus the inverse of the temperature (1/T) ( Temperature varied from 300 °C and 500 °C) resulted in a straight line with a slope of (-E<sub>a</sub>/R), which used to determine the apparent activation energy.

X-ray powder diffraction patterns for the catalysts were collected at room temperature on a laboratory PANalytical X'Pert PRO diffractometer using CuK $\alpha_1$  radiation (1.54060 Å). The samples were loaded into a flat disc like sample holder. The XRPD data were collected in the 2 $\theta$  range from 10 to 90° 2 $\theta$  in steps of 0.017° 2 $\theta$  and 1012 s per step and using a fully opened

X'Celerator detector. The qualitative and quantitative powder analysis with Rietveld refinement of the collected XRPD patterns was performed using the X'Pert High Score Plus Suite [2] and Topas-Academic v.4 software package [3]. Final Rietveld refinement converged with acceptable agreement factors of  $R_{wp} = 9.8\%$  for SCR,  $R_{wp} = 13.2\%$ , for SCR-RED-600,  $R_{wp} = 13.4\%$  for SCR-300-NO and  $R_{wp} = 13.9\%$  for SCR-RED-500-NO.

In the Rietveld refinement the identified phases in each sample were taken into account. The diffraction peaks profiles were approximated using FP or Double-Voigt approach. The refined parameters in the final cycle were 8 background polynomial parameters, zero shift, absorption correction, and for each phase lattice parameters, scale factors, and crystallite size.

***Crystal data and final refinement parameters for SCR sample:***

|                     |                                           |
|---------------------|-------------------------------------------|
| Phase name 1        | TiO <sub>2</sub> -anatase                 |
| Unit cell edges (Å) | a=3,785(1), c=9.510(3)                    |
| Phase wt%           | 95,2(3)                                   |
| Phase name 2        | TiO <sub>2</sub> -rutile                  |
| Unit cell edges (Å) | a=7,087(3), c=6.270(4)                    |
| Phase wt%           | 1,5(3)                                    |
| Phase name 3        | WO <sub>3</sub>                           |
| Unit cell edges (Å) | a=7,31(1), c=7,53(1), c=7,74(1)           |
| Phase wt%           | 1,2(1)                                    |
| Phase name 4        | WVO <sub>4</sub>                          |
| Unit cell edges (Å) | a=4,592(2), c=2,960(3)                    |
| Phase wt%           | 2.1(1)                                    |
| $R_{wp}(\%)$        | 9.82                                      |
| Profile function    | Fundamental parms., Double-Voigt approach |
| Background function | Polynomial Chebychev, order 8             |

***Crystal data and final refinement parameters for SCR-RED-600 sample:***

|                     |                                           |
|---------------------|-------------------------------------------|
| Phase name 1        | TiO <sub>2</sub> -anatase                 |
| Unit cell edges (Å) | a=3,7855(4), c=9.509(1)                   |
| Phase wt%           | 98,7(1)                                   |
| Phase name 2        | VO                                        |
| Unit cell edges (Å) | a=4,0534(4)                               |
| Phase wt%           | 0,98(8)                                   |
| Phase name 3        | WO <sub>3</sub>                           |
| Unit cell edges (Å) | a=7,38(4), c=7,55(4), c=7,75(4)           |
| Phase wt%           | 0,27(6)                                   |
| R <sub>wp</sub> (%) | 13.24                                     |
| Profile function    | Fundamental parms., Double-Voigt approach |
| Background function | Polynomial Chebychev, order 8             |

***Crystal data and final refinement parameters for SCR-300-NO sample:***

|                     |                                                 |
|---------------------|-------------------------------------------------|
| Phase name 1        | TiO <sub>2</sub> -anatase                       |
| Unit cell edges (Å) | a=3,7818(4), c=9.499(1)                         |
| Phase wt%           | 97,0(2)                                         |
| Phase name 2        | V <sub>2-x</sub> Ti <sub>x</sub> O <sub>3</sub> |
| Unit cell edges (Å) | a=5,034(1), c=13,738(5)                         |
| Phase wt%           | 2,2(2)                                          |
| Phase name 3        | WO <sub>3</sub>                                 |
| Unit cell edges (Å) | a=7,4324), c=7,52(2), c=7,60(2)                 |
| Phase wt%           | 0,72(7)                                         |

R<sub>wp</sub>(%) 13.39  
Profile function Fundamental parms., Double-Voigt approach  
Background function Polynomial Chebychev, order 8

***Crystal data and final refinement parameters for SCR-RED-500-NO sample:***

Phase name 1 TiO<sub>2</sub>-anatase  
Unit cell edges (Å) a=3,7848(5), c=9.505(1)  
Phase wt% 98,7(1)  
Phase name 2 VO  
Unit cell edges (Å) a=4,0527(4)  
Phase wt% 0,8(1)  
Phase name 3 WO<sub>3</sub>  
Unit cell edges (Å) a=7,45(3), c=7,55(3), c=7,70(3)  
Phase wt% 0,49(6)  
R<sub>wp</sub>(%) 13.92  
Profile function Fundamental parms., Double-Voigt approach  
Background function Polynomial Chebychev, order 8

## 2. Mass and Heat Transfer Calculations for n-butane oxidation over Ni-Mo/Al<sub>2</sub>O<sub>3</sub> catalyst

*Mears Criterion for External Diffusion (Fogler, p841; Mears, 1971)*

*n-butane activation over oxygen:*

If  $\frac{-r'_A \rho_b R n}{k_c C_{Ab}} < 0.15$ , then external mass transfer effects can be neglected.

$-r'_A$  = reaction rate, kmol/kg-cat · s =  $6.53 \times 10^{-4}$  kmol-C<sub>3</sub>/kg-cat · s

n = reaction order = 2

R = catalyst particle radius, m =  $2 \times 10^{-4}$  m

$\rho_b$  = bulk density of catalyst bed, kg/m<sup>3</sup>

= (1- $\phi$ ) ( $\phi$  = porosity or void fraction of packed bed) = 1035 kg/m<sup>3</sup>

$\rho_c$  = solid catalyst density, kg/m<sup>3</sup> = 1420 kg/m<sup>3</sup>

$C_{Ab}$  = bulk gas concentration of A, kmol/m<sup>3</sup> = 0.0075 kmol/m<sup>3</sup>

$k_c$  = mass transfer coefficient, m/s = 1.25 m/s

$$\frac{-r'_A \rho_b R n}{k_c C_{Ab}} = 8.32 \times 10^{-3} < 0.15 \text{ \{Mears for External Diffusion\}}$$

Similarly, for NO =  $1.22 \times 10^{-3}$

## 3. Weisz-Prater Criterion for Internal Diffusion (Fogler, p839)

If  $C_{WP} = \frac{-r'_{A(obs)} \rho_c R^2}{D_e C_{As}} < 1$ , then internal mass transfer effects can be neglected.

$-r'_{A(obs)}$  = observed reaction rate, kmol/kg-cat · s =  $6.53 \times 10^{-4}$  kmol-C<sub>3</sub>/kg-cat · s

R = catalyst particle radius, m =  $2 \times 10^{-4}$  m

$\rho_c$  = solid catalyst density, kg/m<sup>3</sup> = 1420 kg/m<sup>3</sup>

$D_e$  = effective gas-phase diffusivity, m<sup>2</sup>/s [Fogler, p815]

$$= \frac{D_{AB} \phi_p \sigma_c}{\tau} \text{ where}$$

$D_{AB}$  = gas-phase diffusivity  $\text{m}^2/\text{s}$ ;  $\phi_p$  = pellet porosity;  $\sigma_c$  = constriction factor;  $\tau$  = tortuosity.

$C_{As}$  = gas concentration of A at the catalyst surface,  $\text{kmol-A}/\text{m}^3 = 0.0038 \text{ kmol-C}_3/\text{m}^3$

$$C_{WP} = \frac{-r'_{A(obs)} \rho_c R^2}{D_e C_{As}} = 4.0 \times 10^{-3} < 1 \text{ \{Weisz-Prater Criterion for Internal Diffusion\}}$$

Similarly, for NO =  $2.12 \times 10^{-3}$

#### 4. Mears Criterion for Combined Interphase and Intraparticle Heat and Mass Transport (Mears, 1971)

$$\frac{-r'_A R^2}{C_{Ab} D_e} < \frac{1 + 0.33\gamma\chi}{|n - \gamma_b \beta_b| (1 + 0.33n\omega)}$$

$$\gamma = \frac{E}{R_g T_s}; \gamma_b = \frac{E}{R_g T_b}; \beta_b = \frac{(-\Delta H_r) D_e C_{Ab}}{\lambda T_b}; \chi = \frac{(-\Delta H_r) - r'_A R}{h_t T_b}; \omega = \frac{-r'_A R}{k_c C_{Ab}}$$

$\gamma$  = Arrhenius number;  $\beta_b$  = heat generation function;

$\lambda$  = catalyst thermal conductivity,  $\text{W}/\text{m}\cdot\text{K}$ ;

$\chi$  = Damköhler number for interphase heat transport

$\omega$  = Damköhler number for interphase mass transport

$$\frac{-r'_A R^2}{C_{Ab} D_e} = 2.82 \times 10^{-4} < 3 \text{ \{Mears Criterion for Interphase and Intraparticle Heat and Mass Transport \}}$$

Mass Transport }

Similarly, for NO =  $1.24 \times 10^{-4}$

**Table S1:** The effect of metal oxide, support and promoter on the *n*-butane oxidative activation

| Catalyst                                                                                | <i>n</i> -butane conversion (mol %) | Oxidant         | Temperature | TOF (s <sup>-1</sup> )  | Reference |
|-----------------------------------------------------------------------------------------|-------------------------------------|-----------------|-------------|-------------------------|-----------|
| 7 % V <sub>2</sub> O <sub>5</sub> /SiO <sub>2</sub>                                     | 1.2                                 | Air             | 230         | 0.4 x 10 <sup>-5</sup>  | [4, 5]    |
| 17.5 % V <sub>2</sub> O <sub>5</sub> /Al <sub>2</sub> O <sub>3</sub>                    | 7.2                                 | Air             | 230         | 0.9 x 10 <sup>-5</sup>  | [4, 5]    |
| 6 % V <sub>2</sub> O <sub>5</sub> /Nb <sub>2</sub> O <sub>5</sub>                       | 17.3                                | Air             | 230         | 3.6 x 10 <sup>-5</sup>  | [4, 5]    |
| 4 % V <sub>2</sub> O <sub>5</sub> /ZrO <sub>2</sub>                                     | 16.0                                | Air             | 230         | 4.5 x 10 <sup>-5</sup>  | [4]       |
| 3 % V <sub>2</sub> O <sub>5</sub> /CeO <sub>2</sub>                                     | 10.6                                | Air             | 230         | 6.3 x 10 <sup>-5</sup>  | [4]       |
| 5 % V <sub>2</sub> O <sub>5</sub> /TiO <sub>2</sub>                                     | 27.8                                | Air             | 230         | 19.6 x 10 <sup>-5</sup> | [4]       |
| 1 % V <sub>2</sub> O <sub>5</sub> / 5 % P <sub>2</sub> O <sub>5</sub> /TiO <sub>2</sub> | 12.1                                | Air             | 230         | 27.0 x 10 <sup>-5</sup> | [4]       |
| 6 % WO <sub>3</sub> / 1 % V <sub>2</sub> O <sub>5</sub> /TiO <sub>2</sub>               | 23.6                                | Air             | 230         | 34.1 x 10 <sup>-5</sup> | [4]       |
| γ-Bi <sub>2</sub> MoO <sub>6</sub>                                                      | 30.2                                | Air+steam       | 420         | 43.6 x 10 <sup>-4</sup> | [6]       |
| β-Bi <sub>2</sub> Mo <sub>2</sub> O <sub>9</sub>                                        | 39.8                                | Air+steam       | 320         | 57.8 x 10 <sup>-4</sup> | [6]       |
| BiMoZr <sub>x</sub> oxide                                                               | 42.3                                | Air             | 440         | 6.11 x 10 <sup>-4</sup> | [7]       |
| BiMoFe <sub>x</sub> oxide                                                               | 68.6                                | Air             | 420         | 9.23 x 10 <sup>-4</sup> | [8]       |
| ZrFe <sub>2-x</sub> Al <sub>x</sub> O <sub>4</sub>                                      | 55.1                                | Air             | 420         | 7.96 x 10 <sup>-4</sup> | [9]       |
| ZnFe <sub>2</sub> O <sub>4</sub>                                                        | 41.3                                | Air             | 420         | 5.97 x 10 <sup>-4</sup> | [6, 10]   |
| TiP <sub>2</sub> O <sub>7</sub> -M1                                                     | 24.0                                | CO <sub>2</sub> | 530         | 3.47 x 10 <sup>-4</sup> | [11]      |
| TiP <sub>2</sub> O <sub>7</sub> -M2                                                     | 22.3                                | CO <sub>2</sub> | 530         | 3.22 x 10 <sup>-4</sup> | [11]      |
| 1.2 % Cr 2.8 % V/MCM-41                                                                 | 10.2                                | CO <sub>2</sub> | 550         | 1.47 x 10 <sup>-4</sup> | [12]      |
| 1.2 % Cr 2.8 % V/ZSM-5                                                                  | 8.3                                 | CO <sub>2</sub> | 550         | 1.20 x 10 <sup>-4</sup> | [12]      |
| 1.2 % Cr 2.8 % V/ MCM-22                                                                | 7.2                                 | CO <sub>2</sub> | 550         | 1.04 x 10 <sup>-4</sup> | [12]      |
| 1.2 % Cr 2.8 % V/ZSM-5(Mesoporus)                                                       | 6.1                                 | CO <sub>2</sub> | 550         | 8.81 x 10 <sup>-5</sup> | [12]      |



**Table S2:** Influence of oxidant (O<sub>2</sub>) in the feed over V<sub>2</sub>O<sub>5</sub>-WO<sub>3</sub>/TiO<sub>2</sub> catalyst at temperatures of 350 °C. (Feed Composition: 15 % butane, O<sub>2</sub> to butane ratio of 2, GHSV = 4600 h<sup>-1</sup>)

| Time (min)                                                  | Conversion (%) | Selectivity (mol %)           |                               |                  |                 | Oxidant (O <sub>2</sub> ) conversion (%) | Carbon balance (%) |
|-------------------------------------------------------------|----------------|-------------------------------|-------------------------------|------------------|-----------------|------------------------------------------|--------------------|
|                                                             |                | C <sub>4</sub> H <sub>6</sub> | C <sub>4</sub> H <sub>8</sub> | Cracked Products | CO <sub>x</sub> |                                          |                    |
| <b><u>Oxidant (O<sub>2</sub>) in the feed</u></b>           |                |                               |                               |                  |                 |                                          |                    |
| 30                                                          | 38.2           | 34.2                          | 13.8                          | 22.3             | 29.7            | 96                                       | 98                 |
| 60                                                          | 37.9           | 35.1                          | 13.5                          | 22.5             | 28.9            | 95                                       | 97                 |
| 90                                                          | 38.4           | 34.9                          | 13.7                          | 22.7             | 28.7            | 97                                       | 99                 |
| 120                                                         | 37.5           | 34.5                          | 13.1                          | 22.4             | 30.0            | 96                                       | 98                 |
| 150                                                         | 38.1           | 34.3                          | 13.4                          | 22.9             | 29.4            | 97                                       | 99                 |
| <b><u>Oxidant (O<sub>2</sub>) removed from the feed</u></b> |                |                               |                               |                  |                 |                                          |                    |
| 180                                                         | 25.3           | 44.5                          | 22.1                          | 18.3             | 15.1            | 0                                        | 95                 |
| 210                                                         | 19.4           | 48.3                          | 24.1                          | 27.6             | 0               | 0                                        | 94                 |
| 240                                                         | 13.5           | 45.5                          | 25.1                          | 29.4             | 0               | 0                                        | 95                 |
| 270                                                         | 14.1           | 46.3                          | 24.9                          | 28.8             | 0               | 0                                        | 96                 |
| 300                                                         | 13.9           | 45.1                          | 25.3                          | 29.6             | 0               | 0                                        | 96                 |
| <b><u>Oxidant (O<sub>2</sub>) restored to the feed</u></b>  |                |                               |                               |                  |                 |                                          |                    |
| 330                                                         | 21.8           | 39.3                          | 22.2                          | 35.3             | 3.2             | 99                                       | 98                 |
| 360                                                         | 32.7           | 35.6                          | 19.5                          | 35.3             | 9.6             | 98                                       | 99                 |
| 390                                                         | 35.3           | 35.1                          | 22.5                          | 28.3             | 14.1            | 97                                       | 98                 |
| 420                                                         | 33.2           | 35.9                          | 21.3                          | 27.2             | 15.6            | 98                                       | 99                 |
| 450                                                         | 34.5           | 35.5                          | 20.2                          | 26.1             | 18.2            | 99                                       | 99                 |

**Table S3:** Influence of oxidant (O<sub>2</sub>) in the feed over V<sub>2</sub>O<sub>5</sub>-WO<sub>3</sub>/TiO<sub>2</sub> catalyst at temperatures of 450 °C. (Feed Composition: 15 % butane, O<sub>2</sub> to butane ratio of 2, GHSV = 4600 h<sup>-1</sup>)

| Time (min)                                                  | Conversion (%) | Selectivity (mol %)           |                               |                  |                 | Oxidant (O <sub>2</sub> ) conversion (%) | Carbon balance (%) |
|-------------------------------------------------------------|----------------|-------------------------------|-------------------------------|------------------|-----------------|------------------------------------------|--------------------|
|                                                             |                | C <sub>4</sub> H <sub>6</sub> | C <sub>4</sub> H <sub>8</sub> | Cracked Products | CO <sub>x</sub> |                                          |                    |
| <b><u>Oxidant (O<sub>2</sub>) in the feed</u></b>           |                |                               |                               |                  |                 |                                          |                    |
| 30                                                          | 71.3           | 45.8                          | 9.8                           | 14.6             | 29.8            | 100                                      | 97                 |
| 60                                                          | 69.5           | 44.2                          | 10.3                          | 16.2             | 29.3            | 100                                      | 99                 |
| 90                                                          | 70.5           | 45.5                          | 11.2                          | 14.1             | 29.2            | 100                                      | 98                 |
| 120                                                         | 71.2           | 44.9                          | 10.5                          | 16.1             | 28.5            | 100                                      | 98                 |
| 150                                                         | 71.1           | 45.1                          | 10.1                          | 16.5             | 28.3            | 100                                      | 100                |
| <b><u>Oxidant (O<sub>2</sub>) removed from the feed</u></b> |                |                               |                               |                  |                 |                                          |                    |
| 180                                                         | 52.8           | 58.3                          | 14.2                          | 27.5             | 0               | 0                                        | 99                 |
| 210                                                         | 45.2           | 61.2                          | 16.5                          | 22.3             | 0               | 0                                        | 101                |
| 240                                                         | 44.5           | 61.5                          | 16.8                          | 21.7             | 0               | 0                                        | 99                 |
| 270                                                         | 45.8           | 60.3                          | 16.4                          | 23.3             | 0               | 0                                        | 98                 |
| 300                                                         | 44.1           | 59.5                          | 16.5                          | 24.0             | 0               | 0                                        | 97                 |
| <b><u>Oxidant (O<sub>2</sub>) restored to the feed</u></b>  |                |                               |                               |                  |                 |                                          |                    |
| 330                                                         | 49.5           | 55.2                          | 14.5                          | 6.2              | 24.1            | 100                                      | 99                 |
| 360                                                         | 62.5           | 48.5                          | 13.2                          | 13.1             | 25.2            | 100                                      | 101                |
| 390                                                         | 68.2           | 45.3                          | 13.1                          | 13.3             | 28.3            | 100                                      | 97                 |
| 420                                                         | 68.9           | 44.5                          | 13.5                          | 14.8             | 27.2            | 100                                      | 99                 |
| 450                                                         | 68.7           | 44.9                          | 13.8                          | 15.2             | 26.1            | 100                                      | 98                 |

**Table S4:** Influence of oxidant (NO) in the feed over V<sub>2</sub>O<sub>5</sub>-WO<sub>3</sub>/TiO<sub>2</sub> catalyst at temperatures of 350 °C. (Feed Composition: 15 % butane, NO to butane ratio of 2, GHSV = 4600 h<sup>-1</sup>)

| Time (min)                                       | Conversion (%) | Selectivity (mol %)           |                               |                  |                 | Oxidant (NO) conversion (%) | Carbon balance (%) |
|--------------------------------------------------|----------------|-------------------------------|-------------------------------|------------------|-----------------|-----------------------------|--------------------|
|                                                  |                | C <sub>4</sub> H <sub>6</sub> | C <sub>4</sub> H <sub>8</sub> | Cracked Products | CO <sub>x</sub> |                             |                    |
| <b><i>Oxidant (NO) in the feed</i></b>           |                |                               |                               |                  |                 |                             |                    |
| 30                                               | 25.6           | 57.2                          | 27.2                          | 7.1              | 8.5             | 100                         | 99                 |
| 60                                               | 25.9           | 55.3                          | 25.7                          | 10.3             | 8.7             | 100                         | 98                 |
| 90                                               | 25.4           | 53.7                          | 26.3                          | 11.5             | 8.5             | 100                         | 101                |
| 120                                              | 25.8           | 54.9                          | 25.9                          | 11.1             | 8.1             | 100                         | 99                 |
| 150                                              | 25.9           | 55.7                          | 26.9                          | 9.1              | 8.3             | 100                         | 97                 |
| <b><i>Oxidant (NO) removed from the feed</i></b> |                |                               |                               |                  |                 |                             |                    |
| 180                                              | 18.3           | 56.3                          | 28.4                          | 10.1             | 5.2             | 0                           | 98                 |
| 210                                              | 17.2           | 58.9                          | 26.3                          | 14.8             | 0               | 0                           | 95                 |
| 240                                              | 17.5           | 65.7                          | 27.1                          | 7.2              | 0               | 0                           | 96                 |
| 270                                              | 17.8           | 67.2                          | 28.3                          | 4.5              | 0               | 0                           | 95                 |
| 300                                              | 17.9           | 68.2                          | 27.5                          | 4.3              | 0               | 0                           | 96                 |
| <b><i>Oxidant (NO) restored to the feed</i></b>  |                |                               |                               |                  |                 |                             |                    |
| 330                                              | 19.3           | 65.3                          | 26.3                          | 2.2              | 6.2             | 100                         | 101                |
| 360                                              | 20.1           | 64.1                          | 29.2                          | 0.4              | 6.3             | 100                         | 100                |
| 390                                              | 20.5           | 63.2                          | 23.1                          | 6.8              | 6.9             | 100                         | 99                 |
| 420                                              | 21.8           | 62.5                          | 22.5                          | 7.8              | 7.2             | 100                         | 97                 |
| 450                                              | 22.1           | 64.1                          | 24.3                          | 4.5              | 7.1             | 100                         | 99                 |

**Table S5:** Influence of oxidant (NO) in the feed over V<sub>2</sub>O<sub>5</sub>-WO<sub>3</sub>/TiO<sub>2</sub> catalyst at temperatures of 450 °C. (Feed Composition: 15 % butane, NO to butane ratio of 2, GHSV = 4600 h<sup>-1</sup>)

| Time (min)                                       | Conversion (%) | Selectivity (mol %)           |                               |                  |                 | Oxidant (NO) conversion (%) | Carbon balance (%) |
|--------------------------------------------------|----------------|-------------------------------|-------------------------------|------------------|-----------------|-----------------------------|--------------------|
|                                                  |                | C <sub>4</sub> H <sub>6</sub> | C <sub>4</sub> H <sub>8</sub> | Cracked Products | CO <sub>x</sub> |                             |                    |
| <b><i>Oxidant (NO) in the feed</i></b>           |                |                               |                               |                  |                 |                             |                    |
| 30                                               | 35.2           | 67.2                          | 17.2                          | 7.1              | 8.1             | 100                         | 98                 |
| 60                                               | 35.9           | 65.3                          | 15.7                          | 10.3             | 8.6             | 100                         | 99                 |
| 90                                               | 35.4           | 64.7                          | 16.3                          | 10.5             | 8.3             | 100                         | 99                 |
| 120                                              | 35.8           | 65.9                          | 15.9                          | 10.1             | 8.3             | 100                         | 98                 |
| 150                                              | 35.9           | 68.3                          | 16.9                          | 6.5              | 8.9             | 100                         | 99                 |
| <b><i>Oxidant (NO) removed from the feed</i></b> |                |                               |                               |                  |                 |                             |                    |
| 180                                              | 28.3           | 56.3                          | 18.4                          | 20.1             | 0               | 0                           | 97                 |
| 210                                              | 27.25          | 58.9                          | 16.3                          | 24.8             | 0               | 0                           | 98                 |
| 240                                              | 27.5           | 65.7                          | 17.1                          | 17.2             | 0               | 0                           | 95                 |
| 270                                              | 27.8           | 67.2                          | 18.3                          | 14.5             | 0               | 0                           | 96                 |
| 300                                              | 27.9           | 68.2                          | 17.5                          | 14.3             | 0               | 0                           | 97                 |
| <b><i>Oxidant (NO) restored to the feed</i></b>  |                |                               |                               |                  |                 |                             |                    |
| 330                                              | 29.3           | 65.3                          | 16.3                          | 12.2             | 6.1             | 100                         | 98                 |
| 360                                              | 30.1           | 64.1                          | 19.2                          | 10.4             | 5.5             | 100                         | 99                 |
| 390                                              | 30.5           | 63.2                          | 13.1                          | 16.8             | 5.6             | 100                         | 101                |
| 420                                              | 31.8           | 62.5                          | 12.5                          | 17.8             | 5.5             | 100                         | 98                 |
| 450                                              | 32.1           | 64.1                          | 14.3                          | 14.5             | 5.3             | 100                         | 98                 |

### 3. Kinetics of reduction and oxidation:

The kinetics of reduction and oxidation was calculated using Autochem 2920 Chemisorption analyser. A series of reduction (TPR) and oxidation (TPO) experiments (as explained in Experimental section) were done at different heating rates namely 2 °C/min, 5 °C/min, 7 °C/min, 10 °C/min, 14 °C/min and 20 °C/min. The data are plotted and the slope determined to calculate the rate, activation energy for reduction and oxidation [13].

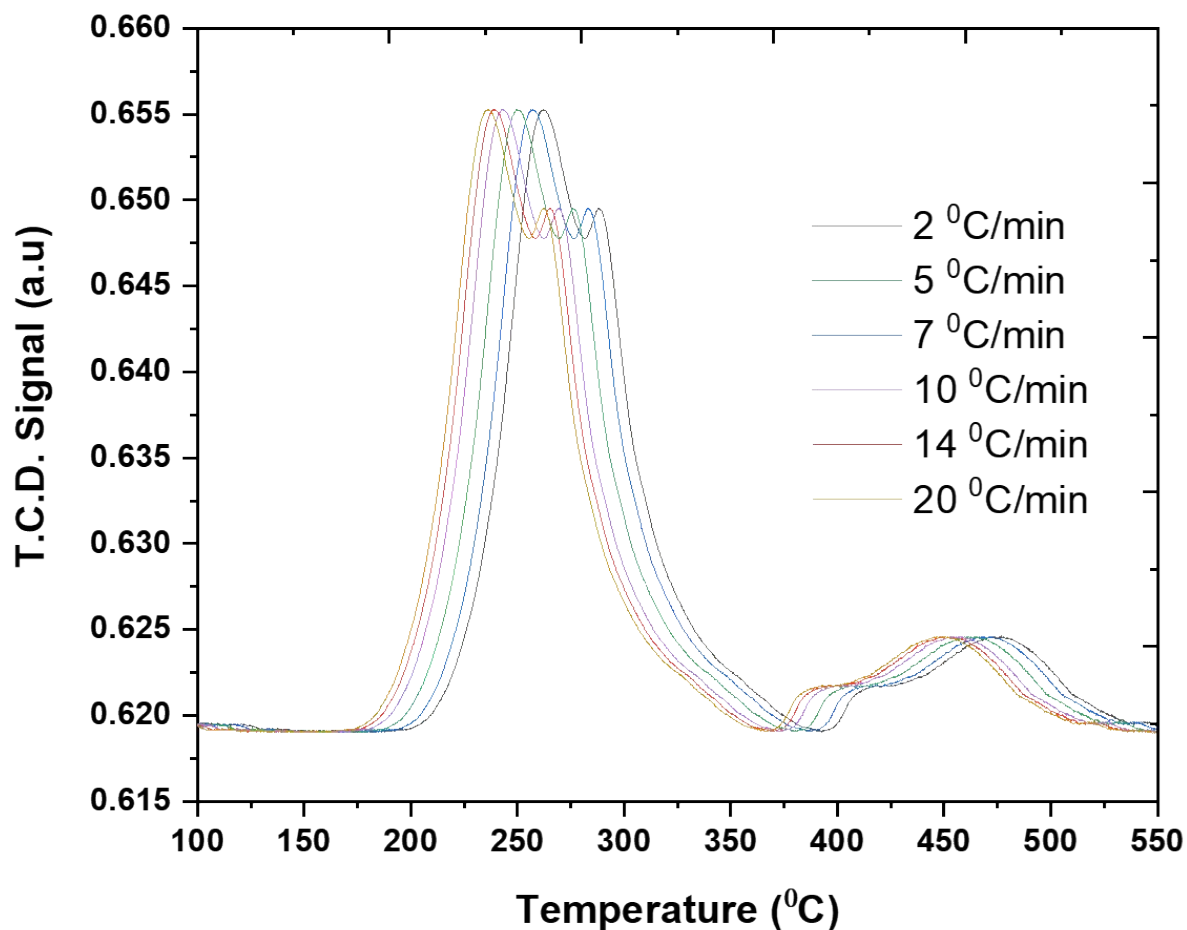

**Figure S1:** First order kinetics of reduction experiments of V<sub>2</sub>O<sub>5</sub>- WO<sub>3</sub>/TiO<sub>2</sub> catalyst

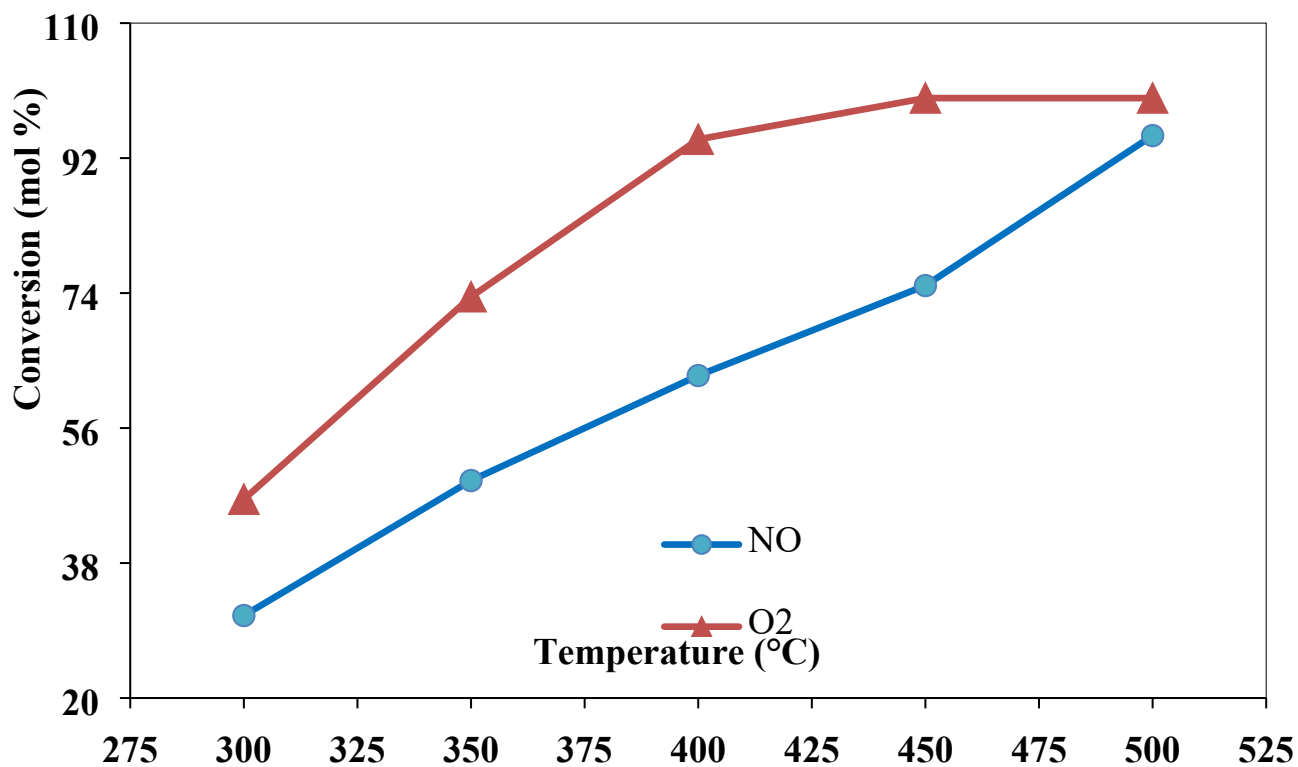

**Figure S2:** Influence of temperature on the conversion of oxidant (NO and O<sub>2</sub>) in oxidative dehydrogenation of butane with the V<sub>2</sub>O<sub>5</sub>-WO<sub>3</sub>/TiO<sub>2</sub> catalyst. Feed Composition: 15 % butane, oxidant to butane ratio of 2, GHSV = 4600 h<sup>-1</sup>.

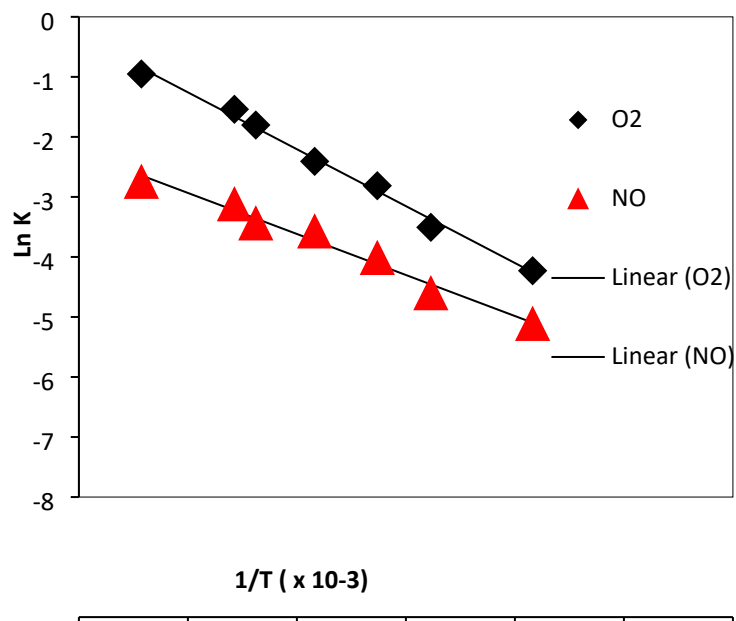

**Figure S3:** Arrhenius relationship profile of *n*-butane activation over V<sub>2</sub>O<sub>5</sub>- WO<sub>3</sub>/TiO<sub>2</sub> catalyst with O<sub>2</sub> and NO as oxidants

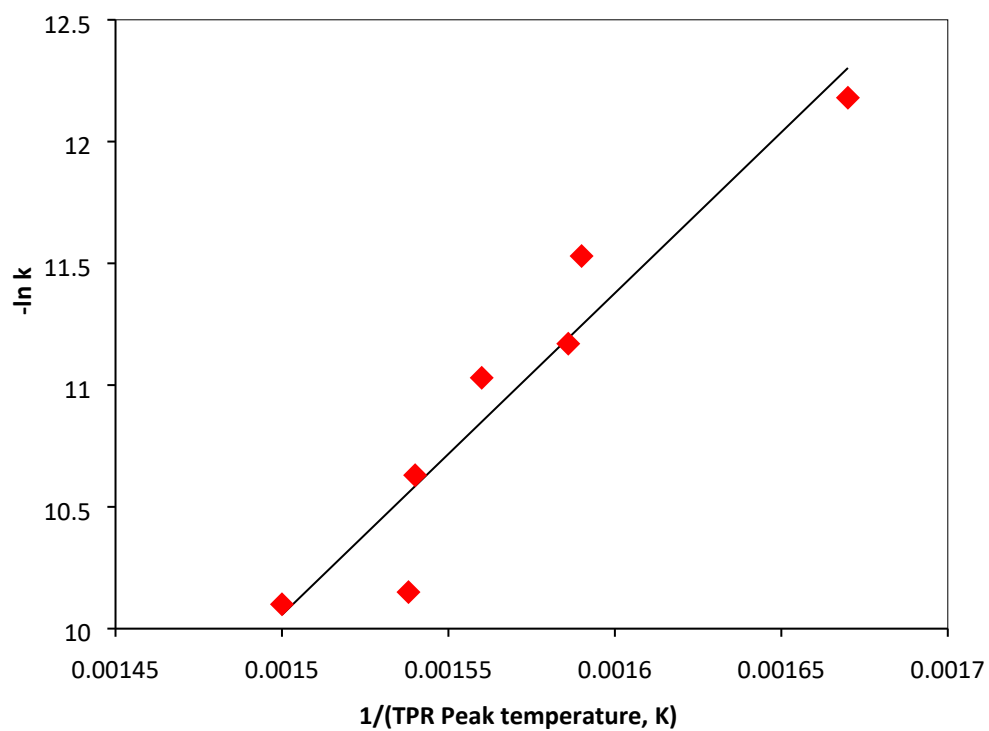

**Figure S4:** Arrhenius relationship profile of reduction (15 % butane in He) of V<sub>2</sub>O<sub>5</sub>- WO<sub>3</sub>/TiO<sub>2</sub> catalyst

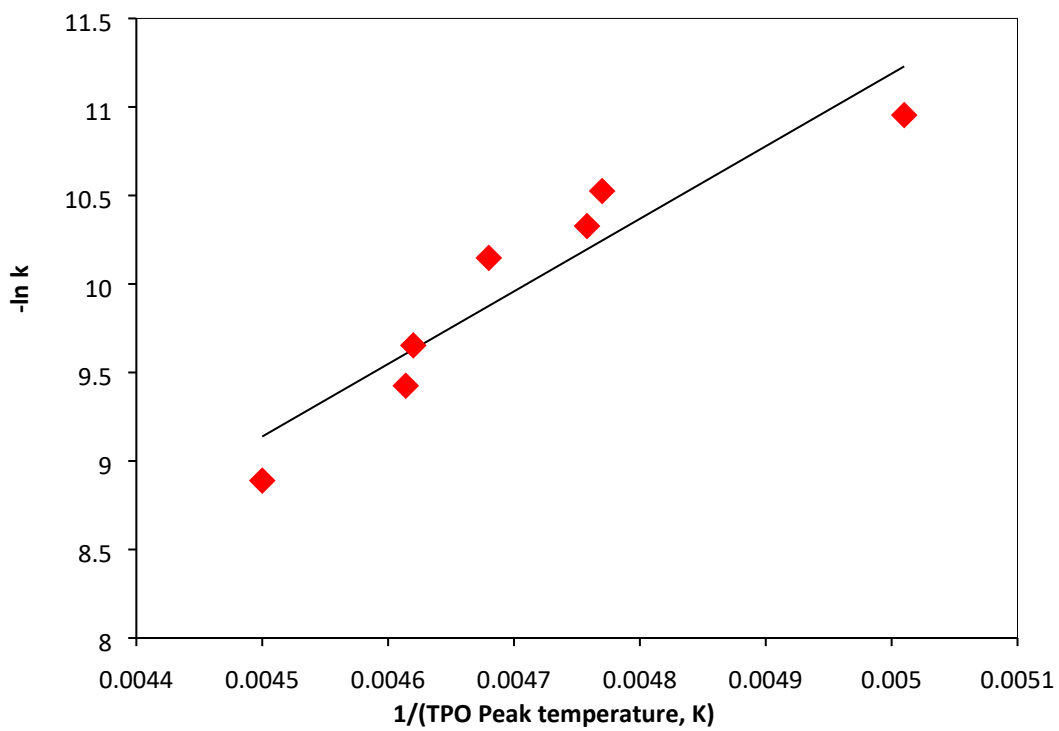

**Figure S5:** Arrhenius relationship profile of oxidation (with  $\text{O}_2$ ) of  $\text{V}_2\text{O}_5$ -  $\text{WO}_3/\text{TiO}_2$  catalyst

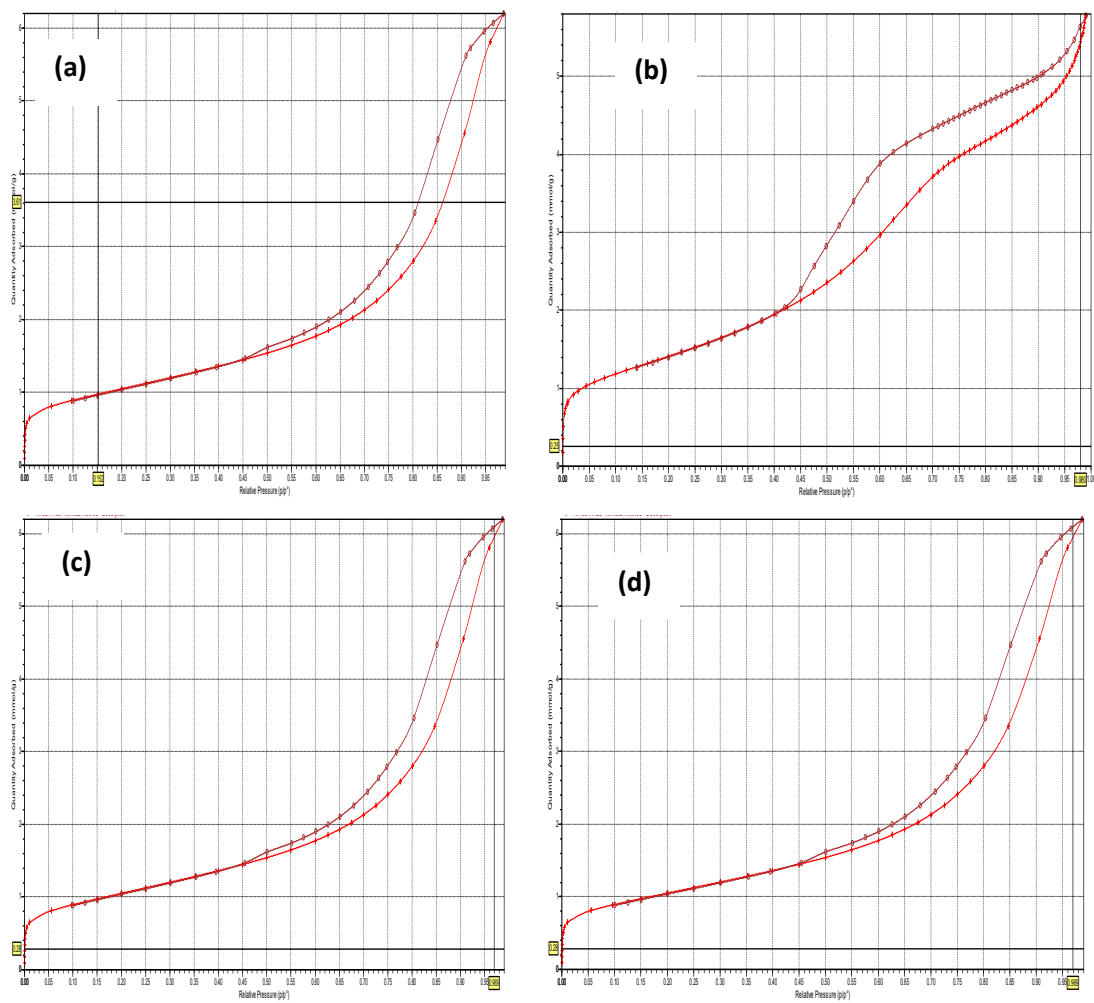

**Figure S6:** N<sub>2</sub> physisorption analysis of (a) fresh, (b) reduced, (c) re-oxidised (with O<sub>2</sub>) at 350 °C and (d) Re-oxidised (with O<sub>2</sub>) at 450 °C

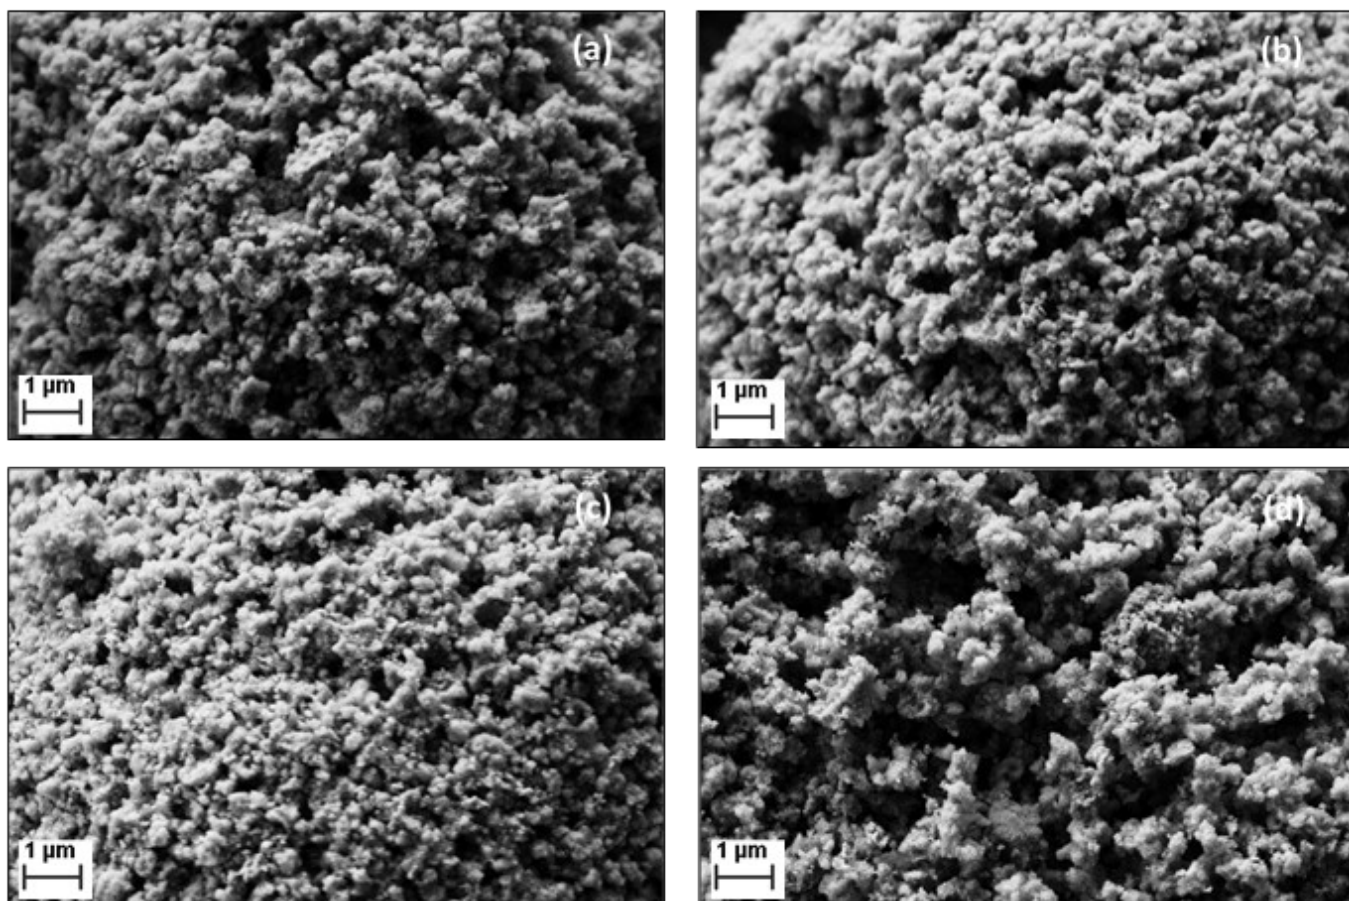

**Figure S7:** Scanning Electronic Microscopic images of  $V_2O_5$ -  $WO_3/TiO_2$  catalyst (a) fresh, (b) reduced, (c) re-oxidised (with  $O_2$ ) at 350 °C and (d) Re-oxidised (with  $O_2$ ) at 450 °C



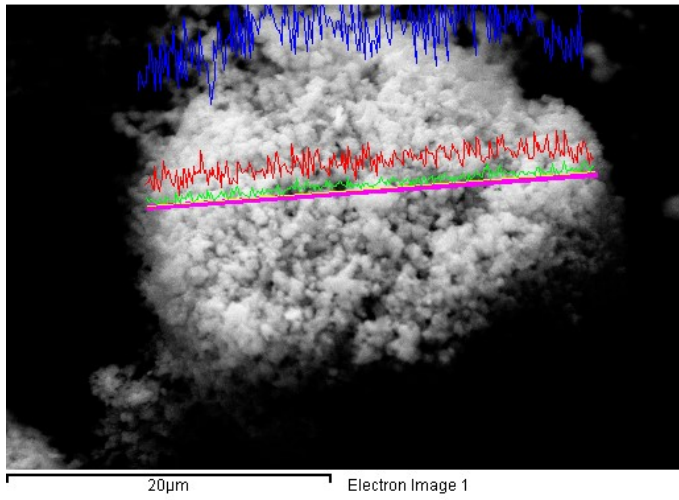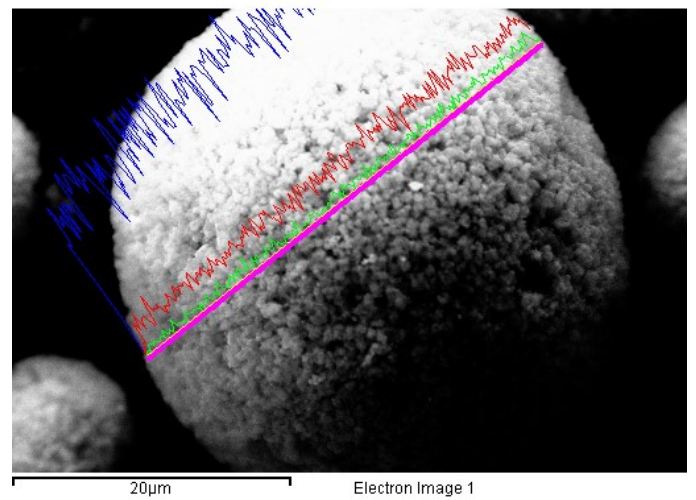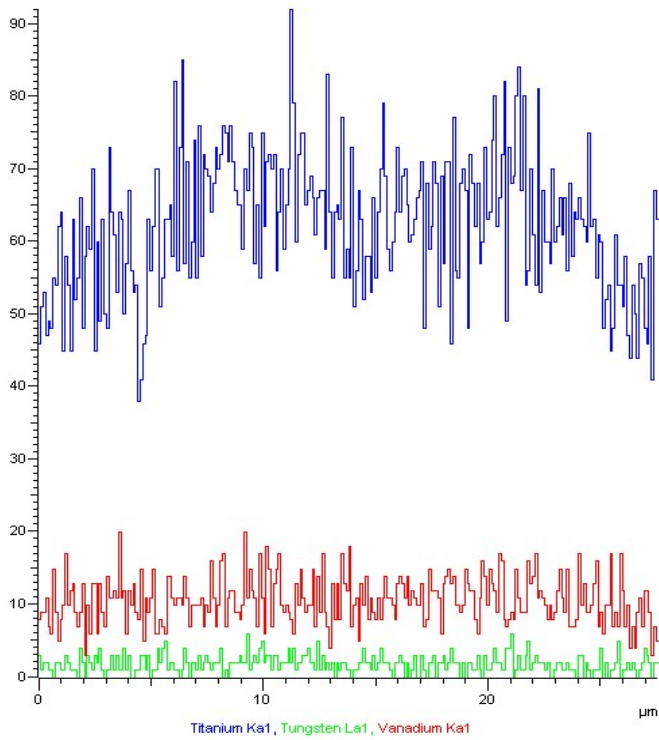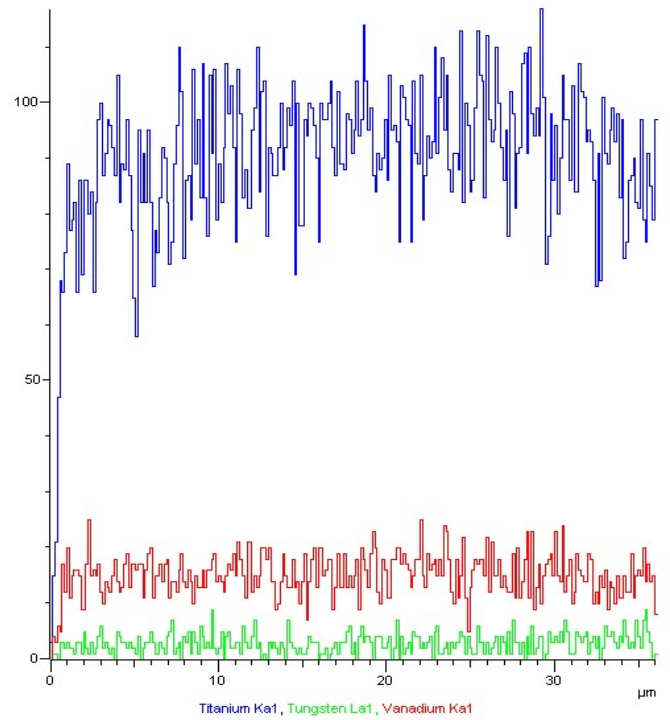

**Figure S8:** SEM-EDX ( Line scanning) analysis of  $V_2O_5$ - $WO_3$ / $TiO_2$  catalyst

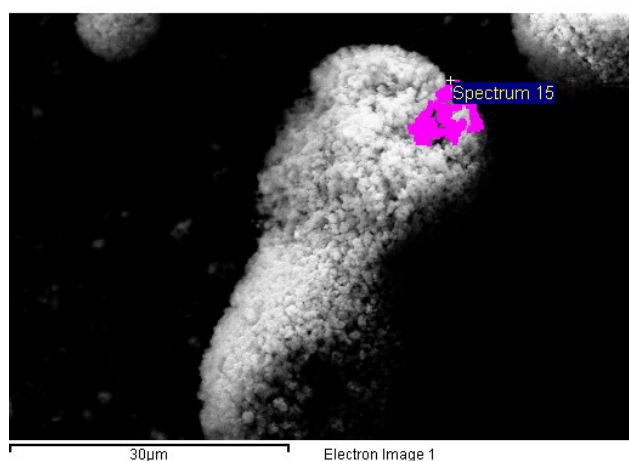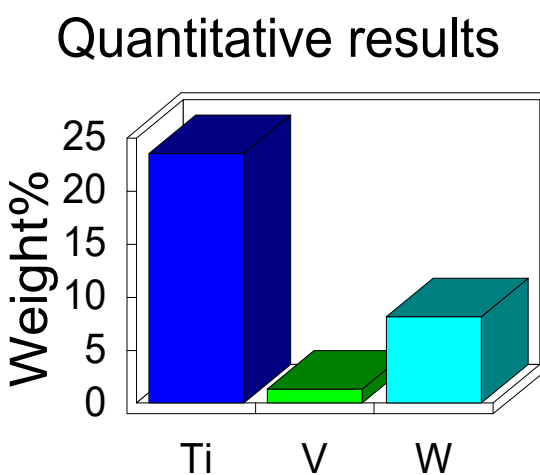

**Figure S9:** Elemental quantitative analyses of  $V_2O_5$ - $WO_3$ / $TiO_2$  catalyst

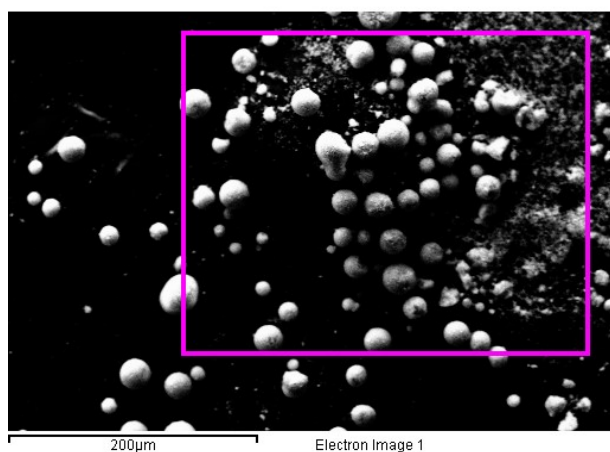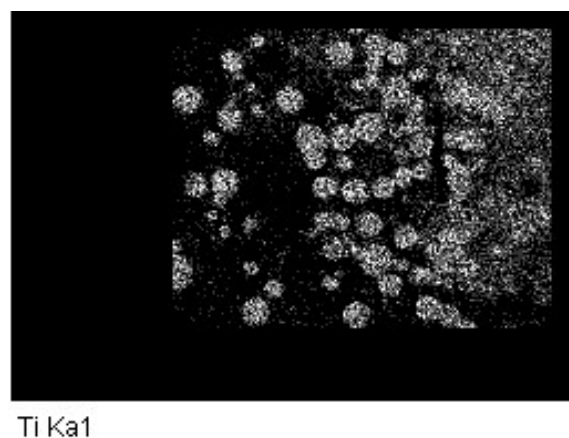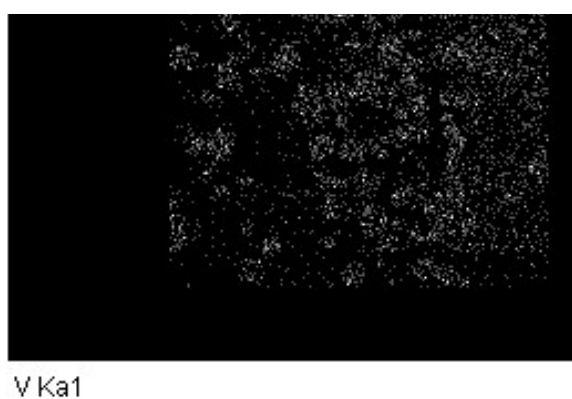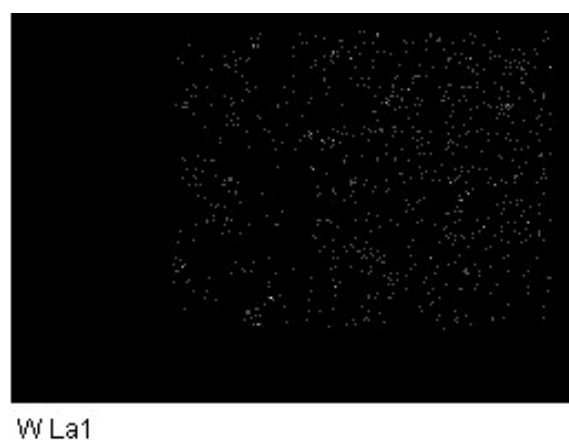

**Figure S10:** SEM-EDX Elemental mapping of  $V_2O_5$ - $WO_3$ / $TiO_2$  catalyst

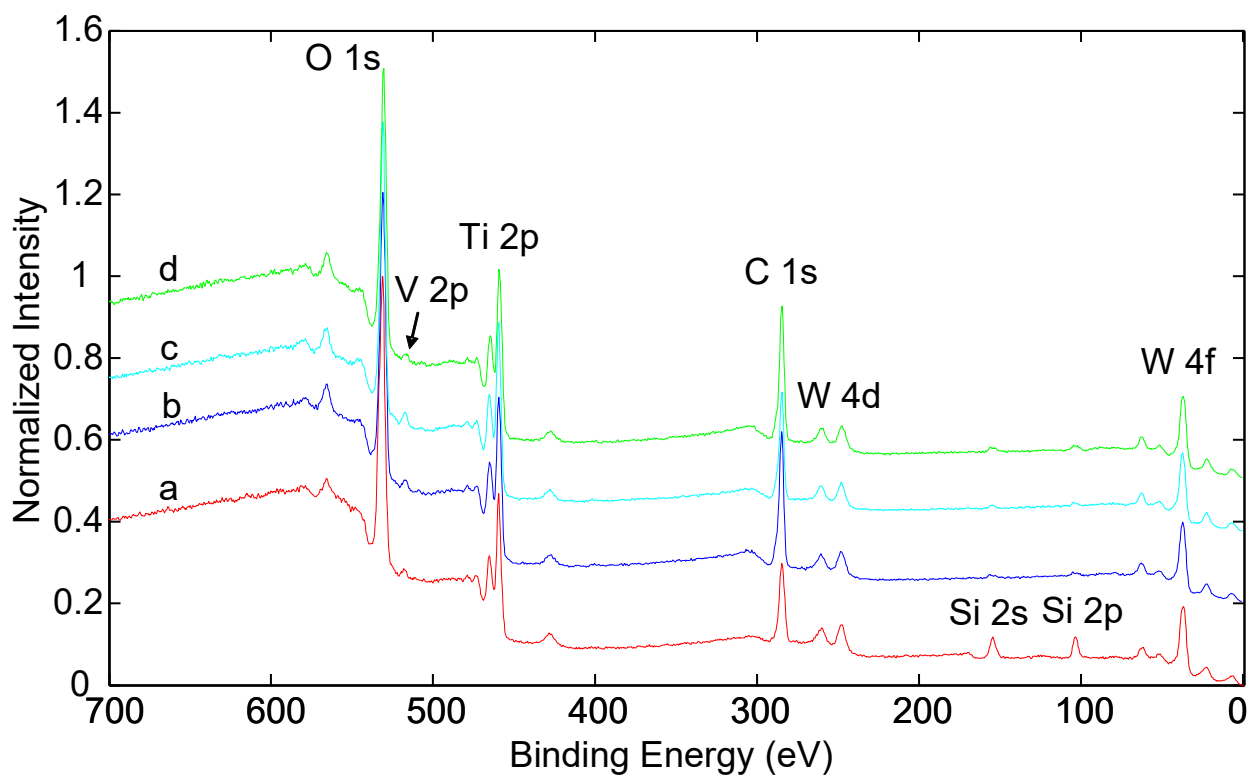

**Figure S11** : XPS spectra from (a) pure sample, (b) reduced sample, (c) sample oxidised at 300 °C (with NO) and (d) sample oxidised at 500 °C (with NO).

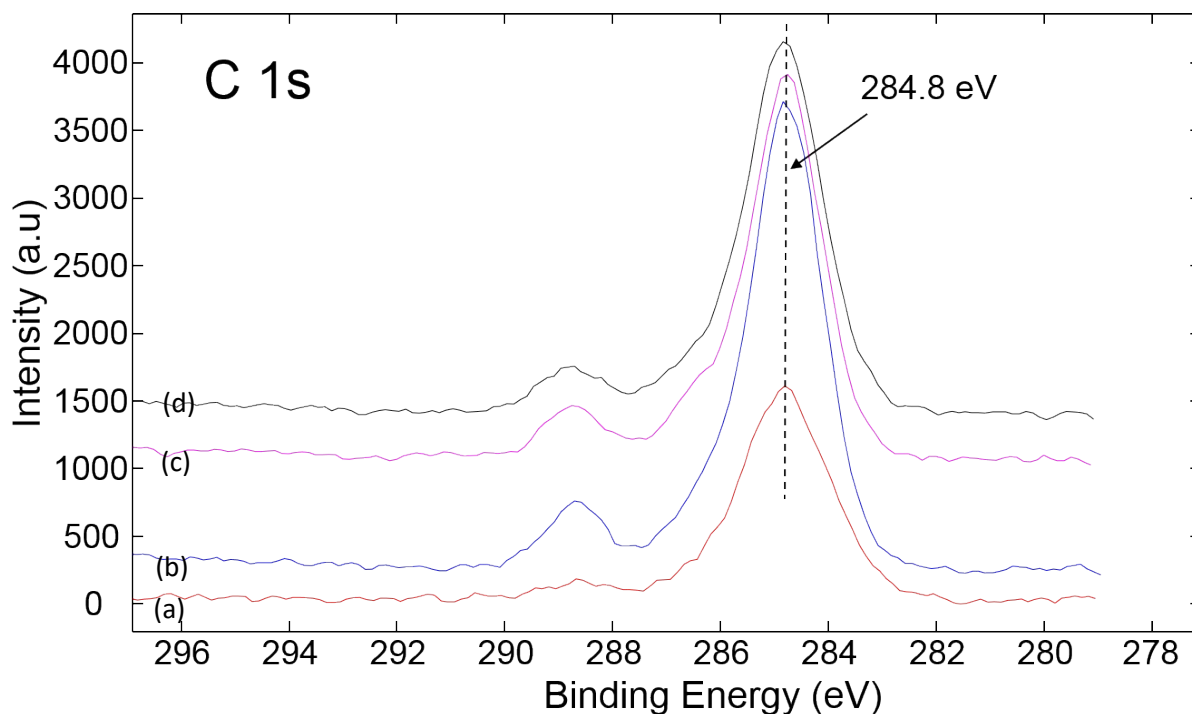

**Figure S12** : XPS high energy resolution spectra C 1s from (a) pure sample, (b) reduced sample, (c) sample oxidised at 300 °C (with NO) and (d) sample oxidised at 500 °C (with NO).

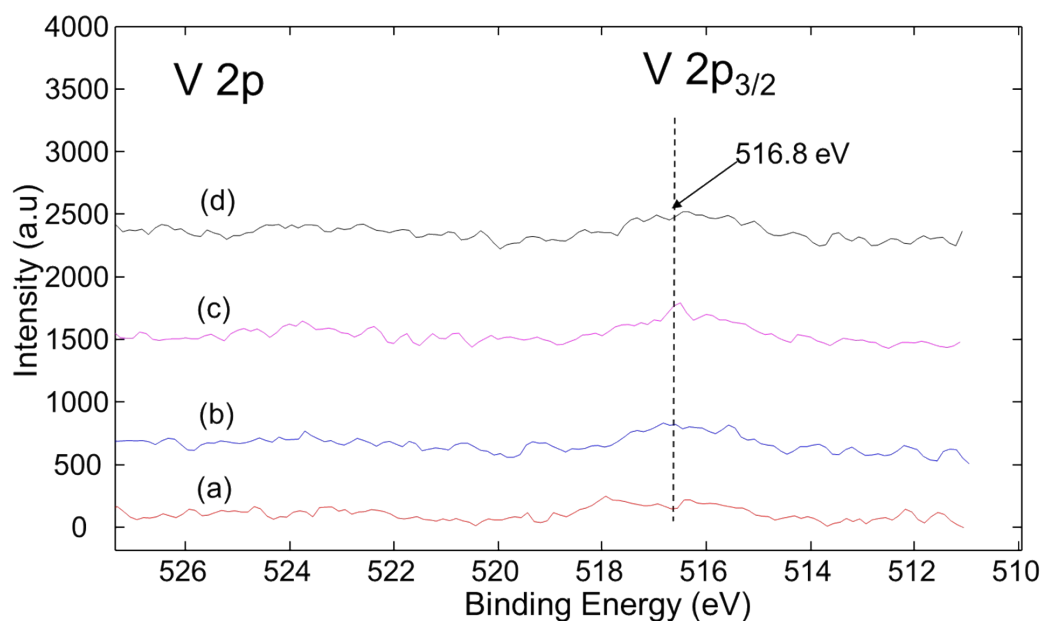

**Figure S13** : XPS high energy resolution spectra V 2p from (a) pure sample, (b) reduced sample, (c) sample oxidised at 300 °C (with NO) and (d) sample oxidised at 500 °C (with NO).

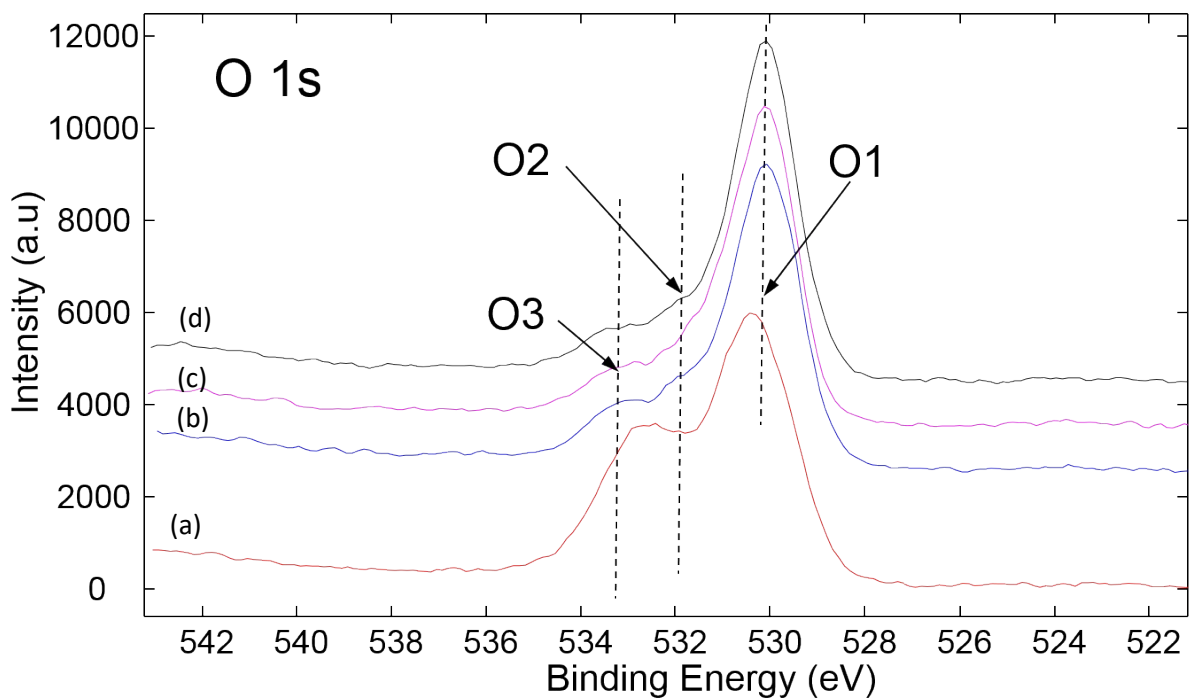

**Figure S14** : XPS high energy resolution spectra of O 1s from (a) pure sample, (b) reduced sample, (c) sample oxidised at 300 °C (with NO) and (d) sample oxidised at 500 °C (with NO).

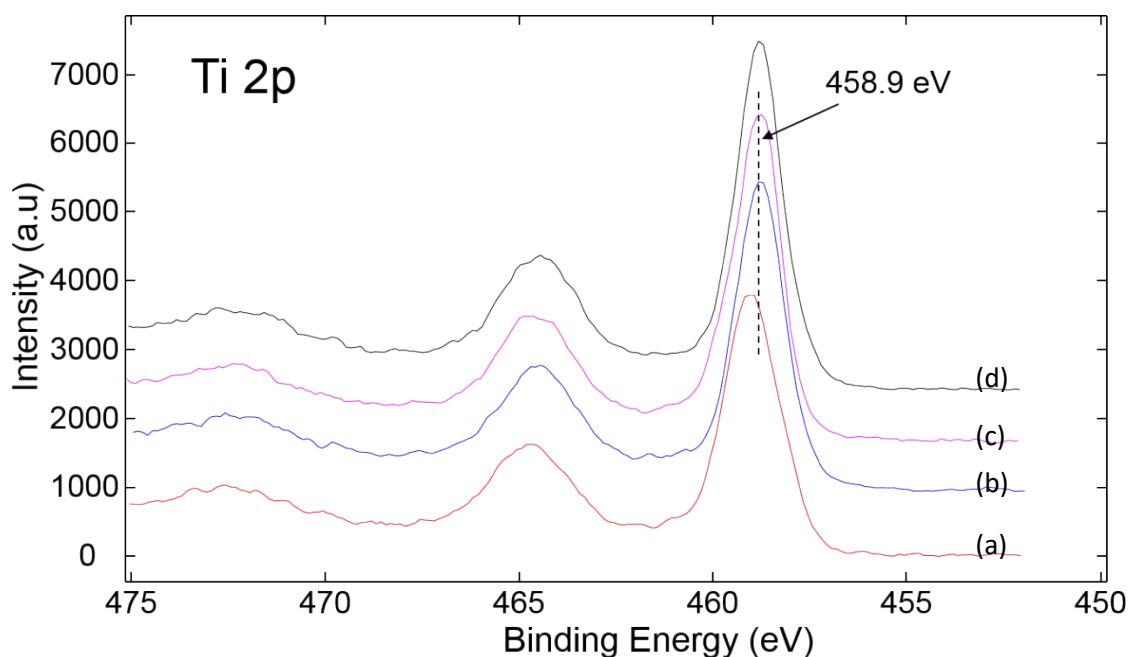

**Figure S15** : XPS high energy resolution spectra of Ti 2p from (a) pure sample, (b) reduced sample, (c) sample oxidised at 300 °C (with NO) and (d) sample oxidised at 500 °C (with NO).

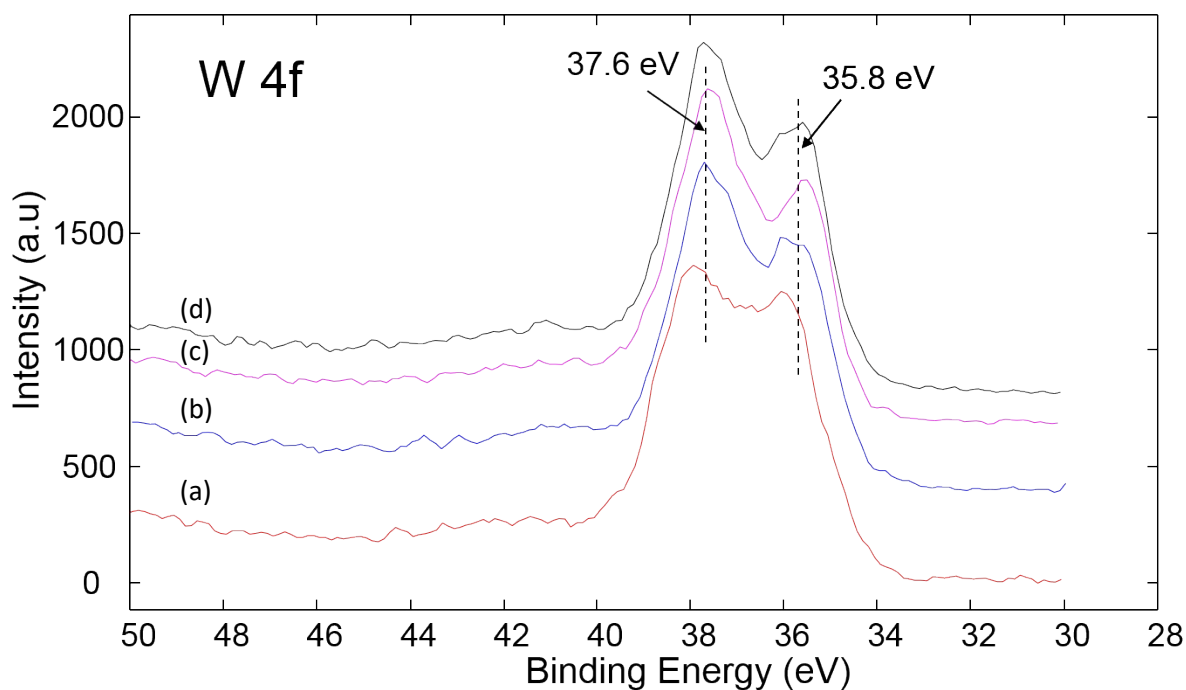

**Figure S16** : XPS high energy resolution spectra of W4f from (a) pure sample, (b) reduced sample, (c) sample oxidised at 300 °C (with NO) and (d) sample oxidised at 500 °C (with NO). Peak corresponding to W 4f overlap with Ti 3s peak at 37.6 eV.

**Table S6:** Surface chemical composition obtained from XPS data of the catalysts treated at different conditions

| <b>Condition</b>                | <b>C (at.%)</b> | <b>O (at.%)</b> | <b>Si (at.%)</b> | <b>Ti (at.%)</b> | <b>V (at.%)</b> | <b>W (at.%)</b> |
|---------------------------------|-----------------|-----------------|------------------|------------------|-----------------|-----------------|
| Fresh                           | 30.5            | 49.2            | 7.4              | 9.4              | 0.7             | 2.9             |
| Reduced                         | 43.4            | 41.5            | 1.3              | 10.6             | 0.6             | 2.7             |
| Oxidised at 300 °C<br>(with NO) | 38.3            | 44.2            | 1.3              | 12.2             | 1.1             | 3.0             |
| Oxidised at 500 °C<br>(with NO) | 42.1            | 41.7            | 2.4              | 10.6             | 0.3             | 2.8             |

**Table S7:** Concentration of various oxygen species obtained from XPS data of the catalysts treated at different conditions

| <b>Condition</b>                | <b>O1 (%)</b> | <b>O2 (%)</b> | <b>O3 (%)</b> |
|---------------------------------|---------------|---------------|---------------|
| Fresh                           | 59            | 17            | 24            |
| Reduced                         | 73            | 16            | 11            |
| Oxidised at 300 °C<br>(with NO) | 73            | 17            | 10            |
| Oxidised at 500 °C<br>(with NO) | 78            | 12            | 10            |

## References

- [1] V.D.B.C. Dasireddy, M. Hus, B. Likozar, Effect of O<sub>2</sub>, CO<sub>2</sub> and N<sub>2</sub>O on Ni-Mo/Al<sub>2</sub>O<sub>3</sub> catalyst oxygen mobility in n-butane activation and conversion to 1,3-butadiene, *Catal. Sci. Tech.*, 7 (2017) 3291-3302.
- [2] T. Degen, M. Sadki, E. Bron, U. König, G. Nénert, The HighScore suite, *Powder Diffraction*, 29 (2014) S13-S18.
- [3] A. Coelho, TOPAS Academic Version 4.1 Technical Reference, Coelho Software, 2007.
- [4] I.E. Wachs, J.-M. Jehng, G. Deo, B.M. Weckhuysen, V.V. Guliants, J.B. Benziger, S. Sundaresan, Fundamental Studies of Butane Oxidation over Model-Supported Vanadium Oxide Catalysts: Molecular Structure-Reactivity Relationships, *J. Catal.*, 170 (1997) 75-88.
- [5] I.E. Wachs, J.-M. Jehng, G. Deo, B.M. Weckhuysen, V.V. Guliants, J.B. Benziger, In situ Raman spectroscopy studies of bulk and surface metal oxide phases during oxidation reactions, *Catal. Today*, 32 (1996) 47-55.
- [6] J.C. Jung, H. Kim, A.S. Choi, Y.-M. Chung, T.J. Kim, S.J. Lee, S.-H. Oh, I.K. Song, Effect of pH in the preparation of  $\gamma$ -Bi<sub>2</sub>MoO<sub>6</sub> for oxidative dehydrogenation of n-butene to 1,3-butadiene: Correlation between catalytic performance and oxygen mobility of  $\gamma$ -Bi<sub>2</sub>MoO<sub>6</sub>, *Catal. Commun.*, 8 (2007) 625-628.
- [7] R. Grasselli, Fundamental Principles of Selective Heterogeneous Oxidation Catalysis, *Top. Catal.*, 21 (2002) 79-88.
- [8] J.-H. Park, C.-H. Shin, Oxidative dehydrogenation of butenes to butadiene over Bi-Fe-Me (Me = Ni, Co, Zn, Mn and Cu)-Mo oxide catalysts, *J. Ind. Eng. Chem.*, 21 (2015) 683-688.
- [9] J.A. Toledo, P. Bosch, M.A. Valenzuela, A. Montoya, N. Nava, Oxidative dehydrogenation of 1-butene over Zn□Al ferrites, *J. Mol. Catal. A: Chem.*, 125 (1997) 53-62.
- [10] Y.-M. Chung, Y.-T. Kwon, T.J. Kim, S.J. Lee, S.-H. Oh, Prevention of Catalyst Deactivation in the Oxidative Dehydrogenation of n-Butene to 1,3-Butadiene over Zn-Ferrite Catalysts, *Catal. Lett.*, 131 (2009) 579-586.
- [11] I.-C. Marcu, I. Sandulescu, J.-M.M. Millet, Oxidehydrogenation of n-butane over tetravalent metal phosphates based catalysts, *Appl. Catal., A*, 227 (2002) 309-320.
- [12] B.R. Jermy, B.P. Ajayi, B.A. Abussaud, S. Asaoka, S. Al-Khattaf, Oxidative dehydrogenation of n-butane to butadiene over Bi-Ni-O/ $\gamma$ -alumina catalyst, *J. Mol. Catal. A: Chem.*, 400 (2015) 121-131.
- [13] A. Gervasini, Temperature Programmed Reduction/Oxidation (TPR/TPO) Methods, in: A. Auroux (Ed.) *Calorimetry and Thermal Methods in Catalysis*, Springer Berlin Heidelberg, Berlin, Heidelberg, 2013, pp. 175-195.
